# Supplementary material
Source: PubMed Central journal article supplement (PMC6199481)
Supplement: zjb999094904s1.pdf [file zjb999094904s1.pdf]

**Table 1. Bacterial strains used in this study.**

| Strain                                   | Genotype                                               | Source or reference |
|------------------------------------------|--------------------------------------------------------|---------------------|
| <i>B. dolosa</i>                         |                                                        |                     |
| BdAU0158                                 |                                                        | BcRLR*              |
| $\Delta bcp-1$                           |                                                        | (1)                 |
| $\Delta bcp-2$                           |                                                        | (1)                 |
| $\Delta bcp-3$                           |                                                        | This study          |
| $\Delta\Delta$                           | <i>BdAU0158</i> $\Delta bcp-1\Delta bcp-2\Delta bcp-3$ | This study          |
| <i>BdAU0158</i>                          | <i>BdAU0158 attTn7::Km</i>                             | This study          |
| <i>BdAU0158</i>                          | <i>BdAU0158 attTn7::Tet</i>                            | This study          |
| $\Delta bcp-1$                           | <i>BdAU0158</i> $\Delta bcp-1 attTn7::Km$              | This study          |
| $\Delta bcp-1$                           | <i>BdAU0158</i> $\Delta bcp-1 attTn7::Tet$             | This study          |
| $\Delta bcp-1 attTn7::bcpI-1$            | <i>BdAU0158</i> $\Delta bcp-1 attTn7::bcpI-1-Km$       | This study          |
| $\Delta bcp-1 attTn7::bcpI-2$            | <i>BdAU0158</i> $\Delta bcp-1 attTn7::bcpI-2-Km$       | This study          |
| $\Delta bcp-2$                           | <i>BdAU0158</i> $\Delta bcp-2 attTn7::Km$              | This study          |
| $\Delta bcp-2 attTn7::bcpI-2$            | <i>BdAU0158</i> $\Delta bcp-2 attTn7::bcpI-2-Km$       | This study          |
| $\Delta bcp-2 attTn7::bcpI-1$            | <i>BdAU0158</i> $\Delta bcp-2 attTn7::bcpI-1-Km$       | This study          |
| $\Delta bcp-3$                           | <i>BdAU0158</i> $\Delta bcp-3 attTn7::Km$              | This study          |
| $\Delta bcp-3 attTn7::bcpI-3$            | <i>BdAU0158</i> $\Delta bcp-3 attTn7::bcpI-3-Km$       | This study          |
| <i>bcp-3<sup>C</sup></i>                 | <i>BdAU0158</i> $\Omega pAP29$                         | This study          |
| $\Delta bcp-3$                           | <i>BdAU0158</i> $\Delta bcp-3 attTn7::Tet$             | This study          |
| $\Delta bcp-3 attTn7::bcpI-3$            | <i>BdAU0158</i> $\Delta bcp-3 attTn7::bcpI-3-Tet$      | This study          |
| <i>P<sub>bcp-1</sub>-lacZ</i>            | <i>BdAU0158 attTn7::P<sub>bcp-1</sub>-lacZ</i>         | This study          |
| <i>P<sub>bcp-2</sub>-lacZ</i>            | <i>BdAU0158 attTn7::P<sub>bcp-2</sub>-lacZ</i>         | This study          |
| <i>P<sub>bcp-3</sub>-lacZ</i>            | <i>BdAU0158 attTn7::P<sub>bcp-3</sub>-lacZ</i>         | This study          |
| <i>P<sub>S12</sub>-lacZ</i>              | <i>BdAU0158 attTn7::P<sub>S12</sub>-lacZ</i>           | This study          |
| <i>lacZ</i>                              | <i>BdAU0158 attTn7::lacZ</i>                           | This study          |
| <i>P<sub>bcpI-3</sub>-lacZ</i>           | <i>BdAU0158 attTn7::P<sub>bcpI-3</sub>-lacZ</i>        | This study          |
| $\Delta bcp-1 attTn7::bcpI_{E264}$       | <i>BdAU0158</i> $\Delta bcp-1 attTn7::bcpI_{E264}-Tet$ | This study          |
| $\Delta bcpO-1$                          | <i>BdAU0158</i> $\Delta bcpO-1 attTn7::Km$             | This study          |
| $\Delta bcpO-2$                          | <i>BdAU0158</i> $\Delta bcpO-2 attTn7::Tet$            | This study          |
| <i>bcp-3<sup>C</sup></i> $\Delta bcpO-3$ | <i>BdAU0158</i> $\Omega pAP29$ $\Delta bcpO-3$         | This study          |
| $\Delta bcpO-3$                          | <i>BdAU0158</i> $\Delta bcpO-3 attTn7::Tet$            | This study          |
| <i>B. thailandensis</i>                  |                                                        |                     |
| <i>BtE264</i>                            |                                                        | (2)                 |
| $\Delta bcpAIOB$                         |                                                        | (3)                 |
| <i>BtE264</i>                            | <i>BtE264 attTn7::Cm</i>                               | (3)                 |
| $\Delta bcpAIOB$                         | <i>BtE264</i> $\Delta bcpAIOB attTn7::Km$              | (3)                 |

|                                                 |                                                           |            |
|-------------------------------------------------|-----------------------------------------------------------|------------|
| <i>ΔbcpAIOB attTn7::bcpI<sub>AU0158-1</sub></i> | <i>BtE264 ΔbcpAIOB attTn7::bcpI<sub>AU0158-1</sub>-Km</i> | This study |
| <u><i>E. coli</i></u>                           |                                                           |            |
| BL21(DE3) pAP30                                 | pET-28(a):: <i>bcpA-1-CT</i>                              | This study |
| BL21(DE3) pAP31                                 | pET-28(a):: <i>bcpA-1-CT—bcpI-1</i>                       | This study |
| BL21(DE3) pAP46                                 | pET-28(a):: <i>bcpI-1</i>                                 | This study |
| BL21(DE3) pAP32                                 | pET-28(a):: <i>bcpA-2-CT</i>                              | This study |
| BL21(DE3) pAP33                                 | pET-28(a):: <i>bcpA-2-CT—bcpI-2</i>                       | This study |
| BL21(DE3) pAP47                                 | pET-28(a):: <i>bcpI-2</i>                                 | This study |
| BL21(DE3) pAP34                                 | pET-28(a):: <i>bcpA-3-CT</i>                              | This study |
| BL21(DE3) pAP35                                 | pET-28(a):: <i>bcpA-3-CT—bcpI-3</i>                       | This study |
| BL21(DE3) pAP48                                 | pET-28(a):: <i>bcpI-3</i>                                 | This study |

\**Burkholderia cepacia* Research Laboratory and Repository, University of Michigan, Ann Arbor, MI USA.

**Table 2. Plasmids used in this study.**

| Plasmid             | Backbone            | Description                                                                                            | Antibiotic Resistance | Source or Reference |
|---------------------|---------------------|--------------------------------------------------------------------------------------------------------|-----------------------|---------------------|
| pEXKm5              | --                  | Allelic exchange vector                                                                                | Km                    | (4)                 |
| pAP10               | pEXKm5              | To delete <i>BdAU0158 bcp-3</i>                                                                        | Km                    | This study          |
| pAP49               | pEXKm5              | To delete <i>BdAU0158 bcpO-1</i>                                                                       | Km                    | This study          |
| pAP50               | pEXKm5              | To delete <i>BdAU0158 bcpO-2</i>                                                                       | Km                    | This study          |
| pAP51               | pEXKm5              | To delete <i>BdAU0158 bcpO-3</i>                                                                       | Km                    | This study          |
| pUC18Tmini-Tn7T-Km  | --                  | To deliver Km <sup>R</sup> cassette to <i>attTn7</i> site                                              | Amp, Km               | (5)                 |
| pUC18Tmini-Tn7T-Tet | pUC18Tmini-Tn7T-Km  | To deliver Tet <sup>R</sup> cassette to <i>attTn7</i> site                                             | Amp, Tet              | (3)                 |
| pTNS3               | --                  | Helper plasmid to deliver cassettes to <i>attTn7</i> site                                              | Amp                   | (6)                 |
| pUCS12Km            | pUC18Tmini-Tn7T-Km  | To deliver P <sub>S12</sub> -driving cassettes to the <i>attTn7</i> site                               | Amp, Km               | (3)                 |
| pAP3                | pUCS12Km            | To deliver <i>BdAU0158 bcpI-1</i> to <i>attTn7</i> site                                                | Amp, Km               | This study          |
| pAP5                | pUCS12Km            | To deliver <i>BdAU0158 bcpI-2</i> to <i>attTn7</i> site                                                | Amp, Km               | This study          |
| pAP42               | pUC18Tmini-Tn7T-Tet | To deliver <i>BdAU0158 bcpI-3</i> (constitutively expressed) to <i>attTn7</i> site                     | Amp, Tet              | This study          |
| pAP29               | pUCS12Km            | 1 <sup>st</sup> 501 bp of <i>BdAU0158 bcpA-3</i> , used to generate <i>BdAU0158 bcp-3<sup>C</sup></i>  | Amp, Km               | This study          |
| pMA43               | pUC18Tmini-Tn7T-Tet | To deliver <i>BtE264 bcpI</i> (constitutively expressed) to <i>attTn7</i> site                         | Amp, Tet              | (3)                 |
| pUClacZ             | pUC18Tmini-Tn7T-Km  | To deliver promoterless <i>lacZ</i> to <i>attTn7</i> site                                              | Amp, Km               | (3)                 |
| pECG10              | pUClacZ             | To deliver P <sub>S12</sub> - <i>lacZ</i> to <i>attTn7</i> site                                        | Amp, Km               | (3)                 |
| pAP23               | pUClacZ             | 500 bp upstream of <i>BdAU1058 bcp-1</i> , to generate <i>BdAU0158 P<sub>bcp-1</sub>-lacZ</i> reporter | Amp, Km               | This study          |
| pAP22               | pUClacZ             | 300 bp upstream of <i>BdAU1058 bcp-2</i> , to generate <i>BdAU0158 P<sub>bcp-2</sub>-lacZ</i> reporter | Amp, Km               | This study          |
| pAP24               | pUClacZ             | 500 bp upstream of <i>BdAU1058 bcp-3</i> , to generate <i>BdAU0158 P<sub>bcp-3</sub>-lacZ</i> reporter | Amp, Km               | This study          |

|           |           |                                                                                                      |         |            |
|-----------|-----------|------------------------------------------------------------------------------------------------------|---------|------------|
| pAP61     | pUClacZ   | Last 500 bp of <i>BdAU1058 bcpA-3</i> , to generate <i>BdAU0158 P<sub>bcpI-3</sub>-lacZ</i> reporter | Amp, Km | This study |
| pET-28(a) | --        | IPTG-inducible expression vector                                                                     | Km      | Novagen    |
| pAP30     | pET-28(a) | <i>BdAU0158 bcpA-1-CT</i>                                                                            | Km      | This study |
| pAP31     | pET-28(a) | <i>BdAU0158 bcpA-1-CT—bcpI-1</i>                                                                     | Km      | This study |
| pAP46     | pET-28(a) | <i>BdAU0158 bcpI-1</i>                                                                               | Km      | This study |
| pAP32     | pET-28(a) | <i>BdAU0158 bcpA-2-CT</i>                                                                            | Km      | This study |
| pAP33     | pET-28(a) | <i>BdAU0158 bcpA-2-CT—bcpI-2</i>                                                                     | Km      | This study |
| pAP47     | pET-28(a) | <i>BdAU0158 bcpI-2</i>                                                                               | Km      | This study |
| pAP34     | pET-28(a) | <i>BdAU0158 bcpA-3-CT</i>                                                                            | Km      | This study |
| pAP35     | pET-28(a) | <i>BdAU0158 bcpA-3-CT—bcpI-3</i>                                                                     | Km      | This study |
| pAP48     | pET-28(a) | <i>BdAU0158 bcpI-3</i>                                                                               | Km      | This study |

## References

1. **Garcia EC, Perault AI, Marlatt SA, Cotter PA.** 2016. Interbacterial signaling via *Burkholderia* contact-dependent growth inhibition system proteins. *Proc Natl Acad Sci USA* **113**:8296–8301.
2. **Brett PJ, DeShazer D, Woods DE.** 1998. *Burkholderia thailandensis* sp. nov., a *Burkholderia pseudomallei*-like species. *Int J Syst Bacteriol* **48 Pt 1**:317–320.
3. **Anderson MS, Garcia EC, Cotter PA.** 2012. The *Burkholderia* *bcpA*IOB genes define unique classes of two-partner secretion and contact dependent growth inhibition systems. *PLoS Genet* **8**:e1002877.
4. **López CM, Rholl DA, Trunck LA, Schweizer HP.** 2009. Versatile dual-technology system for markerless allele replacement in *Burkholderia pseudomallei*. *Appl Environ Microbiol* **75**:6496–6503.
5. **Choi K-H, Mima T, Casart Y, Rholl D, Kumar A, Beacham IR, Schweizer HP.** 2008. Genetic tools for select-agent-compliant manipulation of *Burkholderia pseudomallei*. *Appl Environ Microbiol* **74**:1064–1075.
6. **Choi K-H, Gaynor JB, White KG, Lopez C, Bosio CM, Karkhoff-Schweizer RR, Schweizer HP.** 2005. A Tn7-based broad-range bacterial cloning and expression system. *Nature Methods* **2**:443–448.

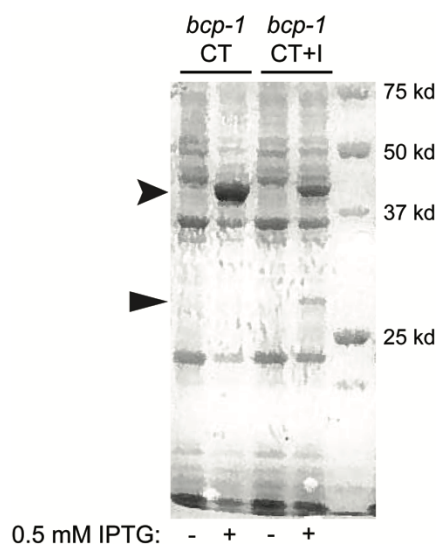

**Figure S1.** Production of *Bd*AU0158 BcpA-1-CT and BcpI-1 by *E. coli* BL21(DE3) as visualized by Coomassie staining of whole cell lysates separated on a 12% SDS-PAGE gel. Cells were harvested after 6 h growth (4 h post IPTG-induction). The accumulation of BcpA-1-CT by the induced strains harboring the plasmid containing *bcpA-1-CT* (left two lanes) and the plasmid containing *bcpA-1-CT* and *bcpI-1* (right two lanes) is indicated by the arrowhead. The wedge indicates production of BcpI-1, which only occurs in the induced strain harboring the plasmid containing *bcpA-1-CT* and *bcpI-1*. The sizes of the two indicated proteins match the predicted sizes of BcpA-1-CT and BcpI-1.
